# Supplementary material for: Cellular Distribution of Canonical and Putative Cannabinoid Receptors in Canine Cervical Dorsal Root Ganglia
Source: PubMed Central journal article supplement (PMC6761858; doi:10.3389/fvets.2019.00313), 2019-09-19
Supplement: Image_3.pdf [file Image_3.pdf]

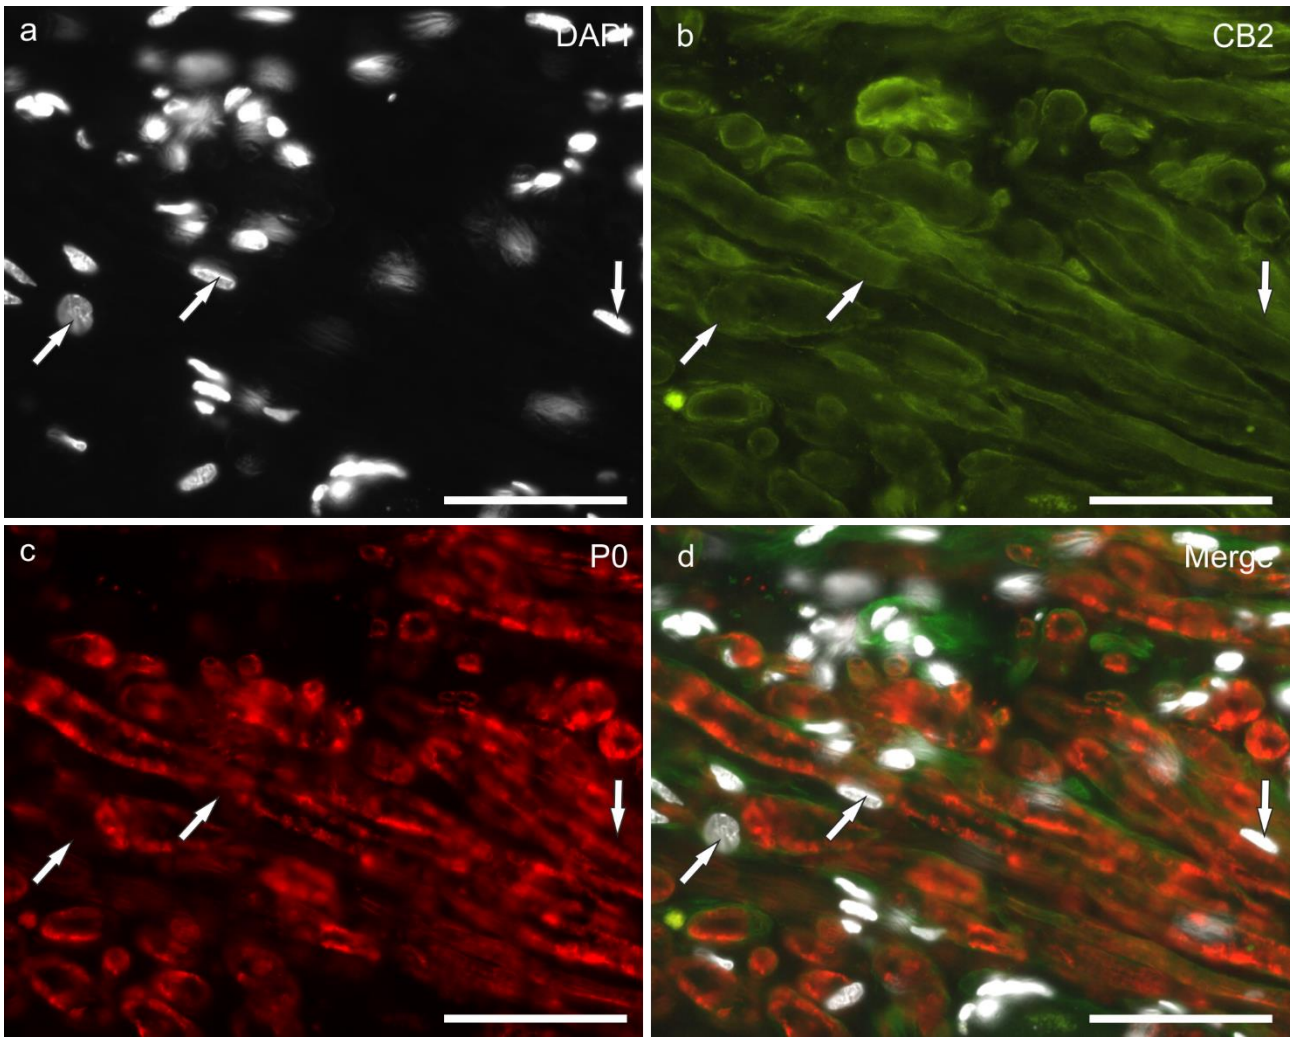

**Supplementary Fig. 3.** a-d) Photomicrographs of cryosections of canine cervical (C8) dorsal root ganglion (DRG) showing cannabinoid receptor 2- (CB2) and myelin protein zero (P0) immunoreactivity. Arrows indicate the nuclei of Schwann cells showing co-localization between CB2 receptor and P0 immunoreactivity.

Bar: a-d= 50  $\mu$ m
